# Supplementary material for: Mutations associated with severity of the pandemic influenza A(H1N1)pdm09 in humans: a systematic review and meta-analysis of epidemiological evidence
Source: Springer Nature journal article supplement (doi:10.1007/s00705-014-2179-z), 2014-07-30
Supplement: MOESM3 [file 8650382]

**Table S3: Assessment of bias in studies included on the review: Mutations in FluApdm09 and severity**

| **No** | **Study name** | **Ref** | **Sample size** | **Study design & sampling procedure** | **Selection  bias** | **Genes of interest sequenced** | **Demographic characteristics** | **Comorbidities** | **Co-infection,  viral or bacterial** | **Overall  Assessment** |
| --- | --- | --- | --- | --- | --- | --- | --- | --- | --- | --- |
| **1** | Puzelli et al., (2010) | [111] | 169 | convenient sample of patients diagnosed with pdm09 | possible | HA | Given | Not given | Not  investigated | Ok |
| **2** | Kilander et al., (2010) | [112] | 266 | samples from severe and mild cases selected through frequency matching | No | HA | Not given | Not given | Not  investigated | Good |
| **3** | Mak et al., (2010) | [113] | 458 | serial mild and severe cases tested at the laboratory | Possible | HA | Not given | Not given | Not  investigated | Ok |
| **4** | Miller et al., (2010) | [114] | 58 | hospitalized and community cases | No | HA | Not given | Not given | Not  investigated | Ok |
| **5** | Graham et al., (2011) | [115] | 235 | sample of mild and severe cases from 11 of the 12 provinces | No | HA, NS1 & PB2 | Given | Not given | Not  investigated | Good |
| **6** | Potdar et al., (2010) | [107] | 13 | representative viruses from major cities | Possible | HA, NS1 & PB2 | Given | Not given | Not  investigated | Ok |
| **7** | Farooqui et al., (2011) | [116] | 10 | patients presenting to hospital with ILI | Possible | HA | Given | Given | Not  investigated | Excellent |
| **8** | Tse et al., (2011) | [108] | 20 | patients admitted to hospital who were positive for pdm09 | Possible | HA | Given | Given | Not  investigated | Excellent |
| **9** | Chen et al., (2010) | [117] | 117 | patients admitted to hospital who were positive for pdm09 | No | HA | Yes | Given | Not  investigated | Excellent |
| **10** | Baldanti et al., (2010) | [109] | 131 | hospitalized and community cases | No | HA | Yes | Not given | Not  investigated | Good |
| **11** | Wedde et al., (2013) | [121] | 357 | fatal, hospitalized and community cases |  | HA | Yes | Given | bacterial co-infection investigated but  not reported | Excellent |
| **12** | Ferreira et al., (2011) | [123] | 90 | fatal and nonfatal cases with ILI | No | HA | Not given | Not given | Not  investigated | Ok |
|  |  |  |  |  |  |  |  |  |  |  |

**Table S3: Assessment of bias in studies included on the review: Mutations in FluApdm09 and severity – continued**

| **No** | **Study name** | **Ref** | **Sample size** | **Study design & sampling procedure** | **Selection  bias** | **Genes of interest sequenced** | **Demographic characteristics** | **Comorbidities** | **Co-infection,  viral or bacterial** | **Overall  Assessment** |
| --- | --- | --- | --- | --- | --- | --- | --- | --- | --- | --- |
| **13** | Moussi et al., (2013) | [122] | 50 | a sample of outpatient, hospitalized and fata pdm09 patients | Possible | HA | Yes | Not given | Not  investigated | Good |
| **14** | Vazquez-Perez et al., (2013) | [120] | 77 | hospitalized and ambulatory patients with pdm09 | No | HA, NS1 & PB2 | Yes | Given | bacterial co- infection given | Excellent |
| **15** | Venter et al., (2012) | [118] | HA-28  PB2-30 | in and outpatients with Flu Apdm09 infections | No | HA, PB2 | Not given | Not given | Not investigated | Good |
| **16** | Promed Email (2009) | [110] | 33 | cohort of people who had camped with the index case and a selection of patients hospitalized with Flu Apdm09 July-Aug 2009 | No | PB2 | Given | Given for index case, others not given | Not investigated | OK |
| **17** | Akcay Ciblak (2013) | [119] | 13 | samples from severe, mild and fatal cases | No | HA, PB2 | Given | Not given | Not investigated | Good |
| **18** | Barrero et al., (2011) | [124] | 21 | fatal, severe and mild cases | No | HA, NS1 | Given | Given | Flu B, RSV,  hPIV3, AdV | Excellent |
|  |  |  |  |  |  |  |  |  |  |  |
